# Supplementary material
Source: publisher figshare collection journal article supplement (https://rs.figshare.com/ndownloader/files/31456298)
Supplement: Supplementary file 1 [file 31456298]

When does cultural evolution become cumulative culture? A case study of humpback whale song

Ellen C. Garland1*, Claire Garrigue 2,3 and Michael J. Noad4

1. Centre for Social Learning and Cognitive Evolution, and Sea Mammal Research Unit, Scottish Oceans Institute, School of Biology, University of St. Andrews, St. Andrews, Fife KY16 8LB, UK
2. UMR ENTROPIE, (IRD, Université de La Réunion, Université de la Nouvelle-Calédonie, IFREMER, CNRS, Laboratoire d’Excellence – CORAIL) 98848, Nouméa, New Caledonia
3. Opération Cétacés, 98802, Nouméa, New Caledonia
4. Cetacean Ecology and Acoustics Laboratory, School of Veterinary Science, University of Queensland, QLD 4343, Australia

*Author for correspondence: Ellen C. Garland ([ecg5@st-andrews.ac.uk](mailto:ecg5@st-andrews.ac.uk))

Electronic Supplementary Material 1

1. Methods – Unit and theme classification

All songs were transcribed and classified as part of [1–4].

(a) Song transcription

As outlined in [1], songs were viewed as spectrograms in Adobe Audition (Blackmann-Harris window, FFT1024, displaying approximately 20 seconds of song from 0-8 kHz) to allow each unit to be viewed clearly. Song was transcribed based on the visual and aural qualities of the sound by ECG. Each unit sound type was assigned a name which was descriptive and allowed the fast recognition of a unit (e.g., moan, whoop). All units in a song session were coded.

(b) Discriminate Function Analysis (DFA) and Classification and Regression Tree analysis (CART)

To ensure consistent naming (classification) of unit types a subset of units (400) were quantitively measured for a number of frequency and duration variables (following [5]). A discriminant function analysis (DFA) with cross-validation was performed. The DFA correctly classified 80% of sounds and predicted classifications were over 60% in all but three of the 25 units [1], consistent with previous DFAs of humpback whale units [5]. The DFA indicated all variable measurements were significantly different among unit types (p<0.0001) [1].

In addition to the DFA, a non-parametric classification tree analysis (CART) with cross-validation was undertaken (in R using *rpart* [6,7]) given the structure of song has the potential for pseudo-replication (see [2] for detailed explanation). CART is non-parametric allowing inclusion of data with non-normal distributions, correlated data (e.g., non-independence), and can incorporate outliers [6–8]. CART grows a tree that branches off from an initial parent node based on specific criteria (see [6–8] for detailed explanations). It grows (each successive node is split) until no further splits can occur (i.e., overgrowing the tree). Cross validation (v-fold) is performed to prune the tree until the lowest misclassification rate is reached. Here, the tree was grown and split into branches based on the Gini Index (reducing impurity of nodes [6]), followed by cross-validation and upward pruning until the lowest misclassification rate was obtained (following [6]’s 1 SE rule). CART resulted in 88% correct classification of units [2] suggesting a robust and repeatable classification at this base level in the song hierarchy.

(c) Theme matching

As outline in [1], to ensure an objective and repeatable classification of themes, three naive observers were asked to match a number of themes. Twenty themes (a reference set) were chosen at random; these were displayed (along with the test set containing 50 sample themes) in Adobe Audition 1.5 to allow the observer to both see and hear each theme. Observers were asked to assign each sample with a theme number or, in the case of three samples, no matching theme. The observers correctly classified 90%, 94%, and 98% resulting in an average and median of 94% agreement in classification [1]. Theme classifications have also been quantitatively assessed; information on these analyses can be found in [2,3].

(d) Statistical analyses

After conducting a Kruskal-Wallis test for significance (*kruskal.test* in R) on the complexity scores, we conducted two post hoc tests that were corrected for multiple comparisons. In the R package *FAS* using the function *dunnTest*, we ran a Kruskal-Wallis with a Benjamini-Hochberg correction (which controls for false discovery), and a second Kruskal-Wallis with the more conservative Bonferroni correction (controls for Type 1 error). Results of both post hoc tests are provided for transparency (table S1), however, results of the more conservative Bonferroni are reported in the main text.

We also conducted a linear regression (*lm*) in R to test whether there was a significant increase in complexity within a song lineage through time. The first time a song type was present in a population was labelled Year 1. The average song complexity was calculated from all songs in that year. We investigated the first three years (Years 1 to 3) as all three song lineages – Black, Blue, Red – had data in these years. Data was normalised per year by subtracting the overall average song complexity for that song lineage (see table S2).

2. Results – Four-variable complexity scores

The complexity score included the four following song variables: number of units per song, number of unit types per song, duration (s) of each song, and number of themes present per song (n=118 songs from 33 singers). All four song measures were positively correlated (p<0.001). The number of themes was positively correlated with the number of unit types (r=0.759), the number of themes was positively correlated with duration of each song (r=0.644), and the number of unit types was positively correlated with the duration of each song (r=0.606). Finally, the number of units per song was positively correlated with the number of themes (r=0.610), the number of units per song was positively correlated with the number of unit types (r=0.644), and the number of units per song was positively correlated with the duration of each song (r=0.895).

The PCA of the four song measures per singer resulted in a single principal component (PC1) that explained 77.03% of the variance with an eigenvalue of 2.000. The unrotated component loadings PC1 were 0.486 for the number of unit types per song, 0.513 for the duration of each song, 0.487 for the number of themes present per song and 0.514 for the number of units per song. The scores for PC1 for each song were extracted and represent the ‘song complexity score’.

A quasi-sinusoidal pattern was again evident from the changes in complexity scores through time in songs (figure S3; table S3). Increases in complexity corresponded to periods of song evolution in both the Blue and Red song lineages, while decreases in complexity matched time periods when song revolutions occurred (e.g., 2004). This pattern, however, was less clear when examining the Black song lineage (1998-2000). A small sample size in 1999 (n= 2 singer, n= 3 songs; table S3) should be viewed with caution. As mentioned in the main Results section, song evolution of the Black song in 2000 resulted in shorter songs with fewer themes included in each song. This has resulted in a reduced complexity score.

3. Supplementary figures and tables

a)


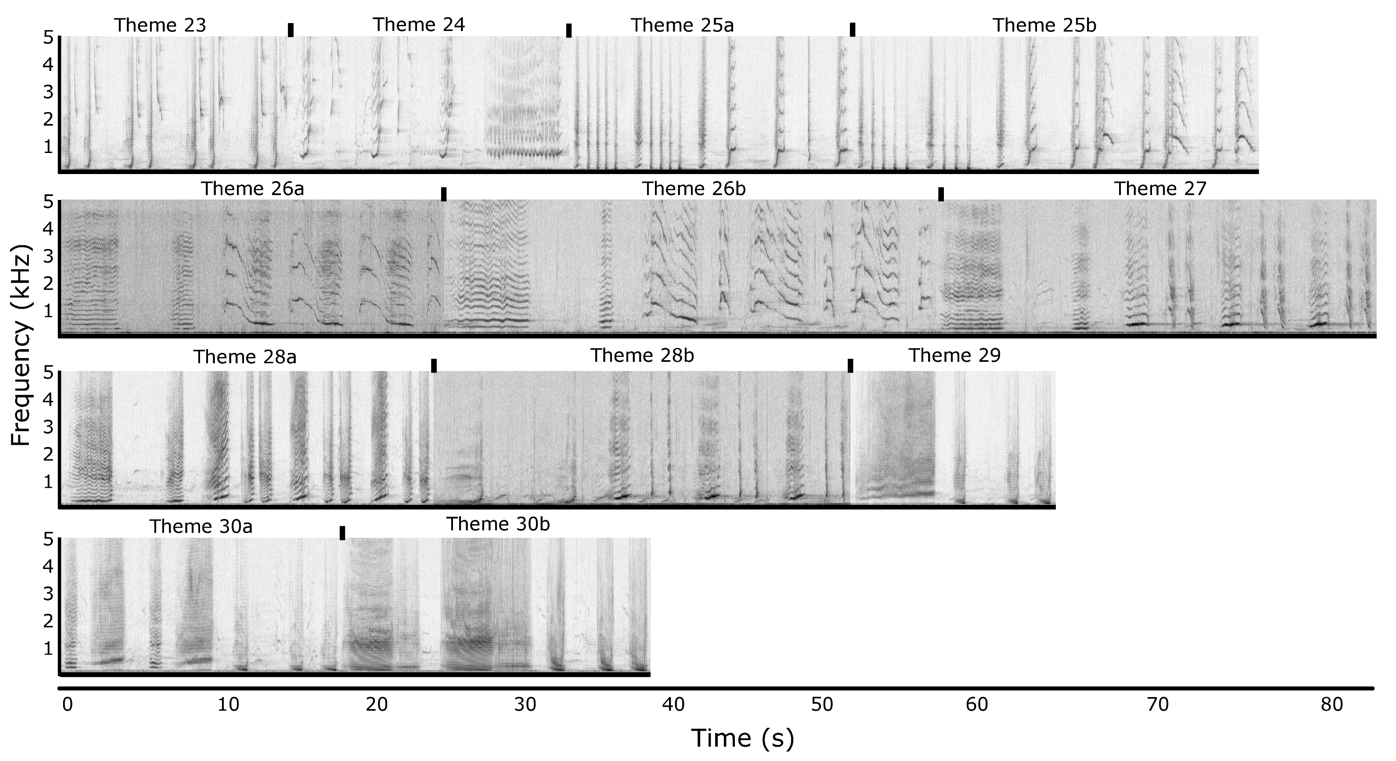


b)


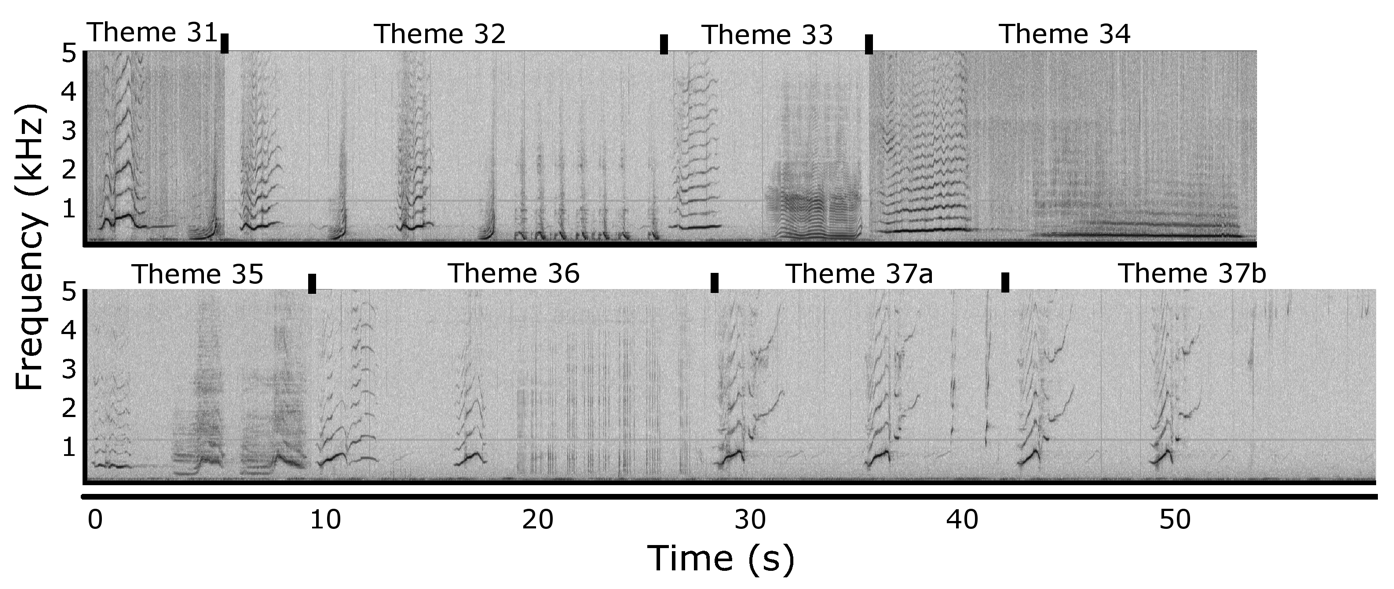


**Figure S1.** a) Spectrogram of the Blue Song Type (Themes 23–30). A representative phrase for each theme is shown. Note that some themes contain ‘‘a’’ and ‘‘b’’ phrases. These were all classified as the Blue song. b) Spectrogram of the Dark Red Song Type (Themes 31–37). A representative phrase for each theme is shown. Note that theme 37 contains ‘‘a’’ and ‘‘b’’ phrases. These were all classified as the Dark Red Song. Reprinted from [1] Current Biology, 21, Garland et al., Dynamic Horizontal Cultural Transmission of Humpback Whale Song at the Ocean Basin Scale, 687-691, Copyright (2011), with permission from Elsevier.

**Figure S2.** Normalised average song complexity scores per year by song lineages. The linear regression indicated song complexity significantly increased each year which corresponded to periods of song evolution (Adj R2 = 0.578, F-statistic=11.98, df=7, p=0.011).


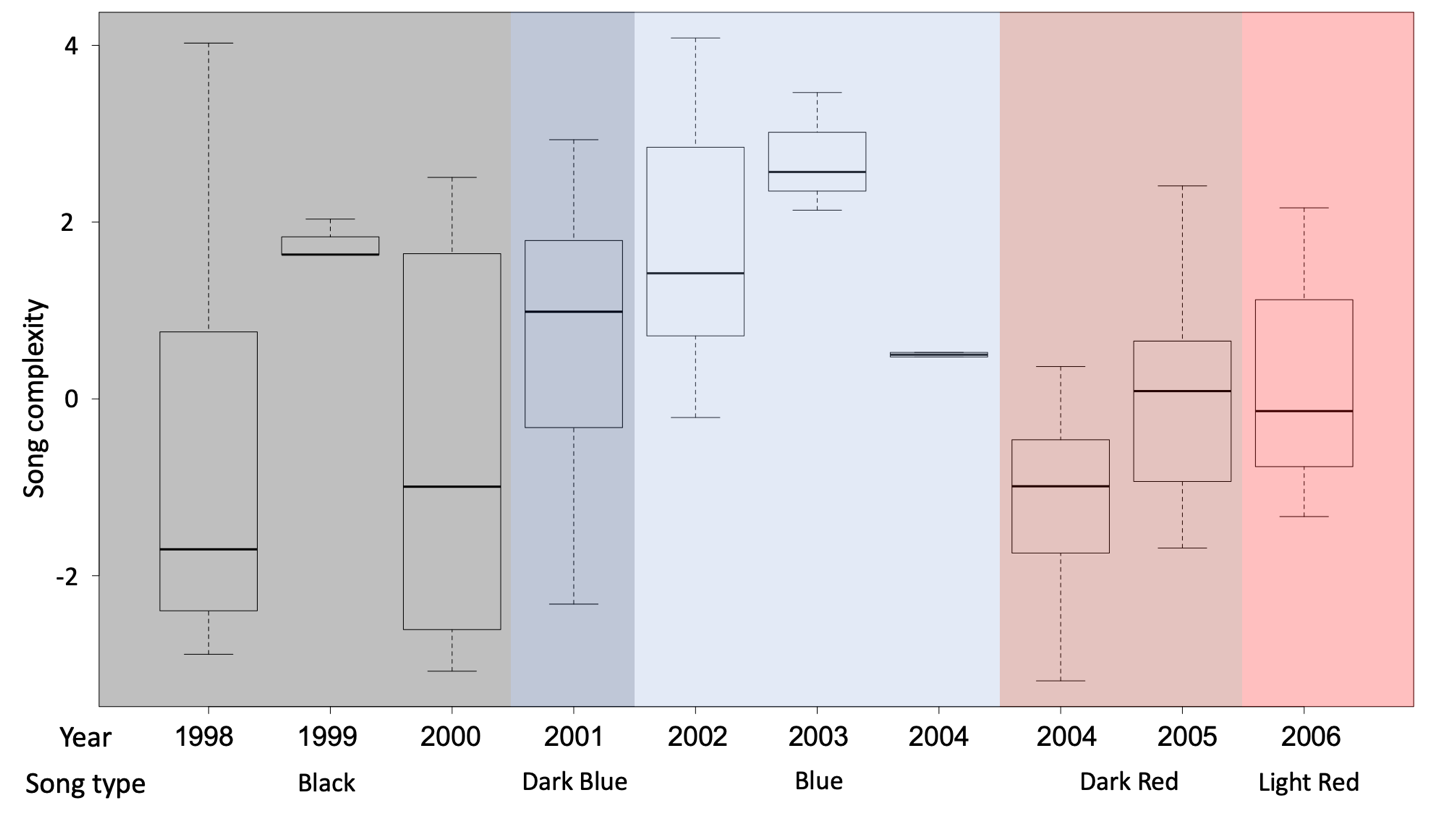


**Figure S3**. Song complexity through time including three song lineages – Black, Blue and Red. Complexity scores were computed from four song measures: # themes, # unit types, #units and duration of each song. Box plots represent all songs in each year to show the variability in scores per year. 2004 had two song types present: the Blue song type was recorded at the start of the season (2004a: left box plot); all other recordings that year were of the Dark Red revolutionary song type (2004b: right box plot).

**Table S1**. Results of the Kruskal-Wallis with Benjamini-Hochberg correction (controls for false discovery), and Kruskal-Wallis with Bonferroni correction (controls for Type 1 error) run in R (package *FAS,* function *dunnTest*) on complexity scores. Unadj. p-value = Unadjusted p-value; Adj. p-value = Adjusted p-value BH = Benjamini-Hochberg correction; Bon = Bonferroni correction. Significance for Adj. p-value: <0.05 *, <0.01 **.

| Comparison Years | | Z | Unadj. p-value | Adj. p-value | |
| --- | --- | --- | --- | --- | --- |
|  |  |  |  | BH | Bonferonni |
| 1998 | 1999 | -5.1109061 | 3.21E-07 | 2.40E-06 ** | 1.44E-05 ** |
| 1998 | 2000 | -2.8784645 | 4.00E-03 | 1.20E-02 * | 1.80E-01 |
| 1999 | 2000 | 2.08825796 | 3.68E-02 | 6.90E-02 | 1.00E+00 |
| 1998 | 2001 | -2.5902635 | 9.59E-03 | 2.27E-02 * | 4.32E-01 |
| 1999 | 2001 | 2.75397675 | 5.89E-03 | 1.66E-02 * | 2.65E-01 |
| 2000 | 2001 | 0.50485409 | 6.14E-01 | 6.42E-01 | 1.00E+00 |
| 1998 | 2002 | -3.4839348 | 4.94E-04 | 2.02E-03 ** | 2.22E-02 * |
| 1999 | 2002 | 1.15583852 | 2.48E-01 | 3.38E-01 | 1.00E+00 |
| 2000 | 2002 | -0.7862019 | 4.32E-01 | 5.25E-01 | 1.00E+00 |
| 2001 | 2002 | -1.3022669 | 1.93E-01 | 2.71E-01 | 1.00E+00 |
| 1998 | 2003 | -7.7367741 | 1.02E-14 | 2.29E-13 ** | 4.59E-13 ** |
| 1999 | 2003 | -2.0519549 | 4.02E-02 | 7.23E-02 | 1.00E+00 |
| 2000 | 2003 | -4.2843966 | 1.83E-05 | 1.03E-04 ** | 8.25E-04 ** |
| 2001 | 2003 | -5.214082 | 1.85E-07 | 1.66E-06 ** | 8.31E-06 ** |
| 2002 | 2003 | -3.1140083 | 1.85E-03 | 5.93E-03 ** | 8.31E-02 |
| 1998 | 2004a | -2.2605126 | 2.38E-02 | 5.10E-02 | 1.00E+00 |
| 1999 | 2004a | 0.7594315 | 4.48E-01 | 5.30E-01 | 1.00E+00 |
| 2000 | 2004a | -0.5356511 | 5.92E-01 | 6.50E-01 | 1.00E+00 |
| 2001 | 2004a | -0.8491864 | 3.96E-01 | 4.95E-01 | 1.00E+00 |
| 2002 | 2004a | -0.0110324 | 9.91E-01 | 9.91E-01 | 1.00E+00 |
| 2003 | 2004a | 1.9984414 | 4.57E-02 | 7.90E-02 | 1.00E+00 |
| 1998 | 2004b | 0.68812375 | 4.91E-01 | 5.53E-01 | 1.00E+00 |
| 1999 | 2004b | 5.52984993 | 3.21E-08 | 3.61E-07 ** | 1.44E-06 ** |
| 2000 | 2004b | 3.39465896 | 6.87E-04 | 2.58E-03 ** | 3.09E-02 * |
| 2001 | 2004b | 3.15143974 | 1.62E-03 | 5.62E-03 ** | 7.31E-02 |
| 2002 | 2004b | 3.94873132 | 7.86E-05 | 3.93E-04 ** | 3.54E-03 ** |
| 2003 | 2004b | 8.03586318 | 9.29E-16 | 4.18E-14 ** | 4.18E-14 ** |
| 2004a | 2004b | 2.61662409 | 8.88E-03 | 2.22E-02 * | 4.00E-01 |
| 1998 | 2005 | -1.5818844 | 1.14E-01 | 1.83E-01 | 1.00E+00 |
| 1999 | 2005 | 3.64636579 | 2.66E-04 | 1.20E-03 ** | 1.20E-02 * |
| 2000 | 2005 | 1.41392412 | 1.57E-01 | 2.44E-01 | 1.00E+00 |
| 2001 | 2005 | 0.9945633 | 3.20E-01 | 4.23E-01 | 1.00E+00 |
| 2002 | 2005 | 2.13489932 | 3.28E-02 | 6.41E-02 | 1.00E+00 |
| 2003 | 2005 | 6.15488978 | 7.51E-10 | 1.13E-08 ** | 3.38E-08 ** |
| 2004a | 2005 | 1.38971391 | 1.65E-01 | 2.39E-01 | 1.00E+00 |
| 2004b | 2005 | -2.1904649 | 2.85E-02 | 5.83E-02 | 1.00E+00 |
| 1998 | 2006 | -1.8384023 | 6.60E-02 | 1.10E-01 | 1.00E+00 |
| 1999 | 2006 | 2.62424725 | 8.68E-03 | 2.30E-02 * | 3.91E-01 |
| 2000 | 2006 | 0.71793727 | 4.73E-01 | 5.46E-01 | 1.00E+00 |
| 2001 | 2006 | 0.30829197 | 7.58E-01 | 7.75E-01 | 1.00E+00 |
| 2002 | 2006 | 1.40123857 | 1.61E-01 | 2.42E-01 | 1.00E+00 |
| 2003 | 2006 | 4.62388583 | 3.77E-06 | 2.42E-05 ** | 1.69E-04 ** |
| 2004a | 2006 | 0.9861666 | 3.24E-01 | 4.17E-01 | 1.00E+00 |
| 2004b | 2006 | -2.3559057 | 1.85E-02 | 4.16E-02 * | 8.31E-01 |
| 2005 | 2006 | -0.5171032 | 6.05E-01 | 6.48E-01 | 1.00E+00 |

**Table S2.** Average complexity score per year within each song lineage. For example, the first time the Blue song lineage is recorded, 2001, corresponds to Year 1 Blue. The average complexity score for the entire song lineage is also included. This grand mean was subtracted from each average measure within the song lineage to create the normalised complexity score per year.

| **Year** | **Song lineage** | | |
| --- | --- | --- | --- |
| **Black** | **Blue** | **Red** |
| 1 | -1.3528045 | -0.149074 | -1.392974 |
| 2 | 0.95583564 | 0.43714869 | -0.4398146 |
| 3 | 0.10621212 | 2.08912597 | -0.2392855 |
| Grand mean | -0.2225075 | 0.81433353 | -0.7264014 |

**Table S3.** Summary of data included in the song complexity analysis (four-variable song measures). Song measures: number of themes per song, number of unit types per song, number of units per song and duration of each song in seconds. *Themes were identified in multiple, previous studies [1–4,9–12].

| **Year** | **Song type** | **#Singers** | **#Songs** | **Themes present*** | **Song measures (mean ± SD)** | | | |
| --- | --- | --- | --- | --- | --- | --- | --- | --- |
| **#Themes** | **#Unit types** | **#Units** | **Dur** |
| 1998 | Black | 5 | 22 | 6a,6b,7a,7b,8a,8b,9a,9b,10a | 4.09 ±2.52 | 11.50 ±7.66 | 117.86 ±75.83 | 285.18 ±129.00 |
| 1999 | Black | 2 | 3 | 6a,7a,7b,8a,8b,9a,9b,10a | 6.67 ±0.58 | 22.67 ±2.08 | 206.67 ±31.97 | 464.00 ±75.48 |
| 2000 | Black | 3 | 10 | 6a,7a,7b,8b,9b,10a,10b,11, 12,13,15a | 4.60 ±2.59 | 19.00 ±13.17 | 89.70 ±54.24 | 252.10 ±142.59 |
| 2001 | Dark Blue | 6 | 16 | 17a,17b,18,19,20,21,22 | 4.88 ±1.54 | 20.44 ±5.92 | 179.31 ±66.60 | 400.44 ±147.90 |
| 2002 | Blue | 3 | 12 | 23,25a,25b,26a,26b,27,28b,29, 30b | 6.08 ±0.67 | 21.00 ±4.00 | 220.67 ±79.11 | 503.42 ±178.91 |
| 2003 | Blue | 2 | 3 | 24,25a,25b,26b,27,28a,28b, 29,30a,30b | 9.00 ±0.00 | 26.67 ±3.21 | 208.00 ±54.95 | 489.33 ±57.95 |
| 2004 | a. Blue | 1 | 2 | 25b,26b,27,28a,29,30a | 6.0  ±0.00 | 20.5 ±0.71 | 141.0 ±1.41 | 314.5 ±0.71 |
|  | b. Dark  Red | 3 | 22 | 31,32,33,34,36,37a,37b | 4.41 ±1.40 | 11.14 ±4.21 | 71.41 ±31.68 | 259.86 ±103.85 |
| 2005 | Dark Red | 6 | 20 | 31,32,33,34,35,36,37a,37b | 4.80 ±1.11 | 17.30 ±3.71 | 128.15 ±51.44 | 353.85 ±138.88 |
| 2006 | Light Red | 2 | 8 | 38,39,40,41,43 | 4.38 ±0.52 | 24.88 ±5.57 | 130.75 ±48.04 | 279.50 ±152.08 |
| **Total** | 5 song types | 33 | 118 | 46 themes | - | - | - | - |

References

1. Garland EC, Goldizen AW, Rekdahl ML, Constantine R, Garrigue C, Hauser ND, Poole MM, Robbins J, Noad MJ. 2011 Dynamic horizontal cultural transmission of humpback whale song at the ocean basin scale. *Curr. Biol.* **21**, 687–691. (doi:10.1016/j.cub.2011.03.019)

2. Garland EC, Lilley MS, Goldizen AW, Rekdahl ML, Garrigue C, Noad MJ. 2012 Improved versions of the Levenshtein distance method for comparing sequence information in animals’ vocalisations: Tests using humpback whale song. *Behaviour* **149**, 1413–1441. (doi:10.1163/1568539X-00003032)

3. Garland EC *et al.* 2013 Quantifying humpback whale song sequences to understand the dynamics of song exchange at the ocean basin scale. *J. Acoust. Soc. Am.* **133**, 560–9. (doi:10.1121/1.4770232)

4. Garland EC. 2011 Cultural transmission of humpback whale song and metapopulation structure in the western and central South Pacific Ocean. University of Queensland.

5. Dunlop RA, Noad MJ, Cato DH, Stokes DM. 2007 The social vocalization repertoire of east Australian migrating humpback whales (*Megaptera novaeangliae*). *J. Acoust. Soc. Am.* **122**, 2893–2905. (doi:10.1121/1.2783115)

6. Breiman L, Friedman JH, Olshen RA, Stone. CG. 1984 *Classification and Regression Trees*. Belmont, CA: Wadsworth International Group.

7. De’ath G, Fabricius KE. 2000 Classification and Regression Trees: A Powerful Yet Simple Technique for Ecological Data Analysis. *Ecology* **81**, 3178–3192.

8. Karels TJ, Bryant AA, Hik DS. 2004 Comparison of discriminant function and classification tree analyses for age classification of marmots. *Oikos* **105**, 575–587. (doi:10.1111/j.0030-1299.2004.12732.x)

9. Smith JN, Goldizen AW, Dunlop RA, Noad MJ. 2008 Songs of male humpback whales, *Megaptera novaeangliae*, are involved in intersexual interactions. *Anim. Behav.* **76**, 467–477. (doi:10.1016/j.anbehav.2008.02.013)

10. Lamoni L. 2018 The role of individual behaviour in the collective cultural evolution of humpback whale songs. University of St. Andrews.

11. Garland EC, Rendell L, Lilley MS, Poole MM, Allen J, Noad MJ. 2017 The devil is in the detail: quantifying vocal variation in a complex, multi-levelled, and rapidly evolving display. *J. Acoust. Soc. Am.* **142**, 460–472. (doi:10.1121/1.4991320)

12. Garland EC, Rendell L, Lamoni L, Poole MM, Noad MJ. 2017 Song hybridization events during revolutionary song change provide insights into cultural transmission in humpback whales. *Proc. Natl. Acad. Sci. U. S. A.* **114**, 7822–7829. (doi:10.1073/pnas.1621072114)
